# Supplementary material
Source: PubMed Central journal article supplement (PMC5075056)
Supplement: AAC.01043-16_zac011165623so1.pdf [file AAC.01043-16_zac011165623so1.pdf]

### Supplemental Figure S1.

Validation of the DSP assay in a high-throughput screening (HTS) format.

The DSP assay was evaluated for suitability as an HTS assay using a 384-well format. Effector and target 293FT cells were cocultured with different concentrations of DMSO, as indicated. As a positive control, camostat in 1% DMSO was included. The results of the DSP assay are shown in (A). Each bar represents the RL activity shown in relative light units (RLU) under different conditions as indicated. (B) Based on the result of (A), several parameters of the 384-well-based DSP assay were calculated to determine whether the assay was suitable for HTS, even in the presence of 2% DMSO. The data suggested that small dispersion (CV) and high sensitivity (SB and SN). A statistical parameter of assay quality, Z' factor, was  $>0.5$ . This indicated that this assay was suitable for HTS even under the presence of 2% DMSO.

### Supplemental Table S1.

The names of drugs screened in this study are listed.

# Supplemental Figure S1

A

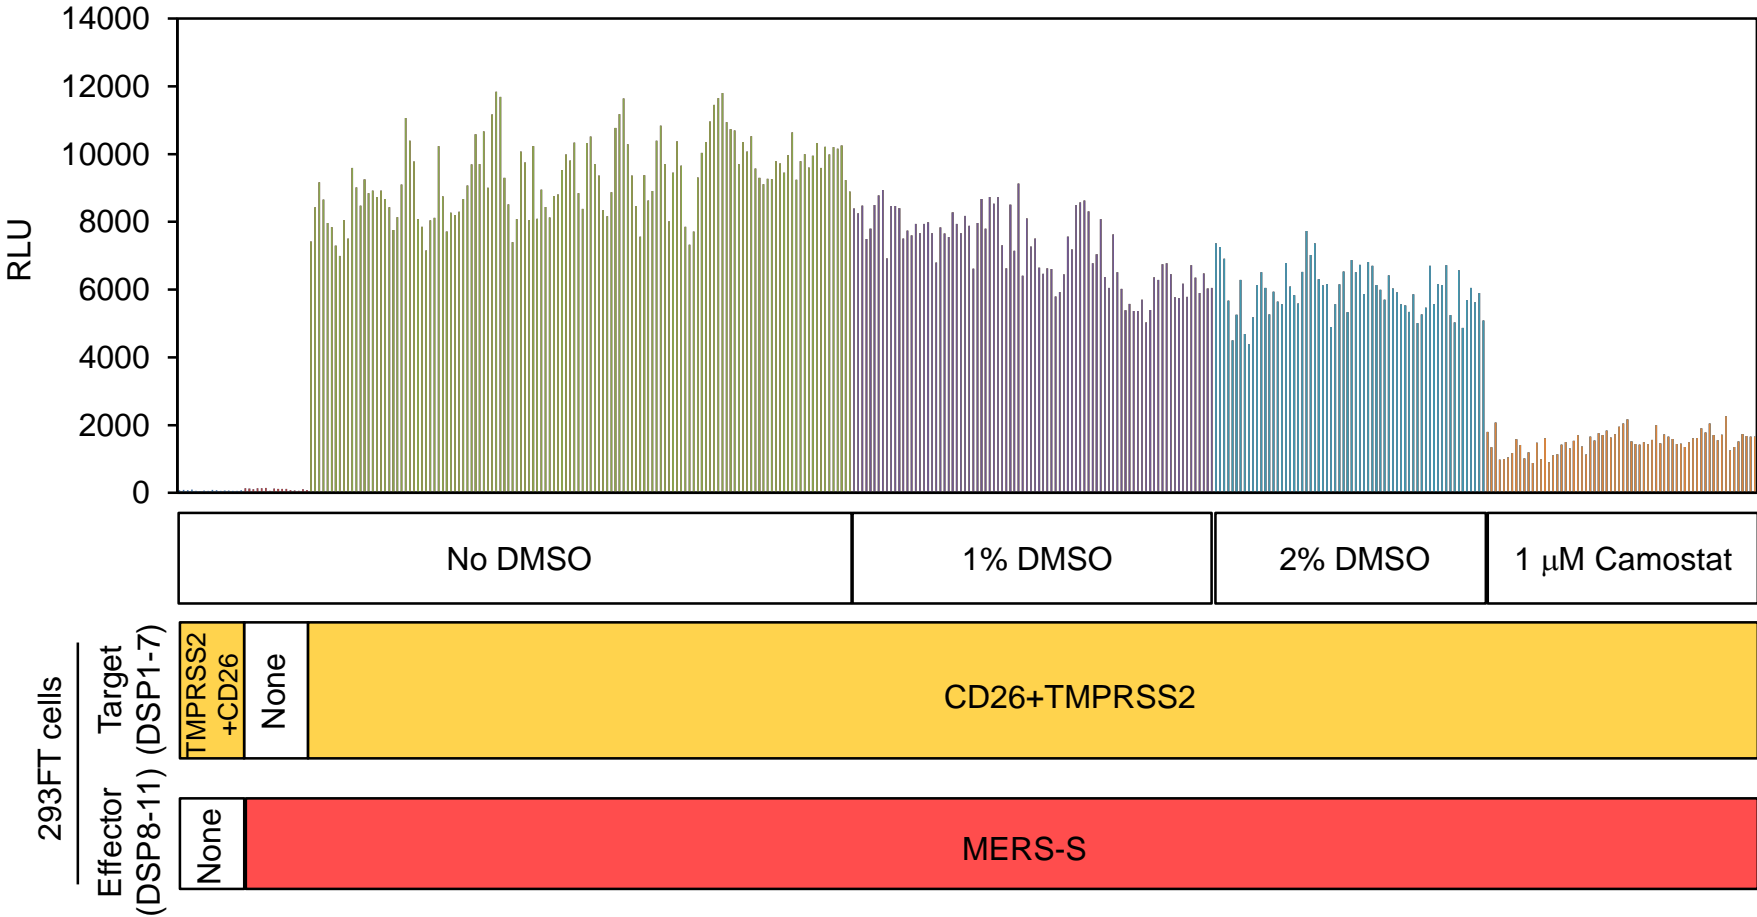

## Supplemental Figure S1

B

|               |                           |          |          |
|---------------|---------------------------|----------|----------|
| Target cell   | 293FT-DSP1-7 CD26+TMPRSS2 |          |          |
| Effector cell | 293FT-DSP8-11 MERS-S      |          |          |
| Chemical      | None                      | DMSO(1%) | DMSO(2%) |
| CV value (%)  | 12.0                      | 14.6     | 12.0     |
| SB value      | 103.0                     | 79.6     | 65.8     |
| SN value      | 326.0                     | 251.3    | 207.2    |
| Z' factor     | 0.62                      | 0.54     | 0.61     |

**Supplemental Table S1.**  
**List of the 1017 FDA-approved drugs**

|                                        |
|----------------------------------------|
| (+,-)-Octopamine HCl                   |
| 10-DAB (10-Deacetylbaecatin)           |
| 1-Hexadecanol                          |
| 2-Methoxyestradiol                     |
| 2-Thiouracil                           |
| 5-Aminolevulinic acid hydrochloride    |
| 9-Aminoacridine                        |
| Abitrexate (Methotrexate)              |
| Acadesine                              |
| Acarbose                               |
| Acebutolol HCl                         |
| Aceclidine HCl                         |
| Acemetacin (Emflex)                    |
| Acetanilide (Antifebrin)               |
| Acetarstone                            |
| Acetylcholine chloride                 |
| Acetylcysteine                         |
| Acipimox                               |
| Acitretin                              |
| Acridinium Bromide                     |
| Acyclovir (Aciclovir)                  |
| Adapalene                              |
| Adefovir Dipivoxil (Preveon, Hepsera)  |
| Adenine hydrochloride                  |
| Adenosine (Adenocard)                  |
| Adiphenine HCl                         |
| Adrenalone HCl                         |
| Adrucil (Fluorouracil)                 |
| Afatinib (BIBW2992)                    |
| Agomelatine                            |
| Albendazole (Albenza)                  |
| Albendazole Oxide (Ricobendazole)      |
| Alexidine HCl                          |
| Alfacalcidol                           |
| Alfuzosin hydrochloride (Uroxatral)    |
| Alibendol                              |
| Aliskiren hemifumarate                 |
| Allopurinol (Zyloprim)                 |
| Allylthiourea                          |
| Almotriptan malate (Axert)             |
| Alprostadil (Caverject)                |
| Altrenogest                            |
| Altretamine (Hexalen)                  |
| Alverine Citrate                       |
| Amantadine hydrochloride (Symmetrel)   |
| Ambrisentan                            |
| Amfebutamone (Bupropion)               |
| Amfenac Sodium (monohydrate)           |
| AMG-073 HCl (Cinacalcet hydrochloride) |
| Amidopyrine                            |
| Amiloride hydrochloride (Midamor)      |
| Amiloride hydrochloride dihydrate      |
| Aminocaproic acid (Aminocap) (Amicar)  |
| Aminoglutethimide (Cytadren)           |
| Aminophylline (Truphylline)            |

|                                    |
|------------------------------------|
| Aminosalicylate sodium             |
| Aminothiazole                      |
| Amiodarone HCl                     |
| Amisulpride                        |
| Amitriptyline HCl                  |
| Amlodipine (Norvasc)               |
| Amlodipine besylate (Norvasc)      |
| Ammonium Glycyrrhizinate (AMGZ)    |
| Amorolfine Hydrochloride           |
| Amoxicillin (Amoxycillin)          |
| Amoxicillin sodium (Amox)          |
| Amphotericin B (Abelcet)           |
| Ampicillin sodium                  |
| Ampicillin Trihydrate              |
| Ampiroxicam                        |
| Amprenavir (Agenerase)             |
| Amprolium HCl                      |
| Anagrelide HCl                     |
| Anastrozole                        |
| Aniracetam                         |
| Anisindione                        |
| Anisotropine Methylbromide         |
| Antazoline HCl                     |
| Antipyrine                         |
| Apatinib (YN968D1)                 |
| Apixaban                           |
| Aprepitant (MK-0869)               |
| Arbidol HCl                        |
| Arcoline                           |
| Argatroban                         |
| Aripiprazole (Abilify)             |
| Aroadate                           |
| Artemether (SM-224)                |
| Artemisinin                        |
| Articaine HCl                      |
| Asenapine                          |
| Aspartame                          |
| Aspirin (Acetylsalicylic acid)     |
| Atazanavir sulfate                 |
| Atomoxetine HCl                    |
| Atorvastatin calcium (Lipitor)     |
| Atovaquone (Atavaquone)            |
| Atracurium besylate                |
| Atropine                           |
| Avanafil                           |
| Avobenzone (Parsol 1789)           |
| Axitinib                           |
| Azacitidine (Vidaza)               |
| Azacyclonol                        |
| Azaguanine-8                       |
| Azaperone                          |
| Azatadine dimaleate                |
| Azathioprine (Azasan, Imuran)      |
| Azelastine hydrochloride (Astelin) |
| Azelnidipine                       |
| Azilsartan (TAK-536)               |
| Azilsartan Medoxomil (TAK-491)     |
| Azithromycin (Zithromax)           |
| Azithromycin Dihydrate             |

|                                        |
|----------------------------------------|
| Azlocillin sodium salt                 |
| Aztreonam (Azactam, Cayston)           |
| Bacitracin                             |
| Balofloxacin                           |
| Bazedoxifene HCl                       |
| Beclomethasone dipropionate            |
| Bekanamycin                            |
| Bemegride                              |
| Benazepril hydrochloride               |
| Bendamustine HCL                       |
| Bendroflumethiazide                    |
| Benidipine hydrochloride               |
| Benserazide                            |
| Bentiromide                            |
| Benzbromarone                          |
| Benzethonium chloride                  |
| Benzocaine                             |
| Benzoic acid                           |
| Benzthiazide                           |
| Benztropine mesylate                   |
| Benzydamine Hydrochloride              |
| Benzympenicillin sodium                |
| Bephenium Hydroxynaphthoate            |
| Bepotastine Besilate                   |
| Bergapten                              |
| Beta Carotene                          |
| Betahistine 2HCl                       |
| Betamethasone (Celestone)              |
| Betamethasone Dipropionate (Diprolene) |
| Betamethasone valerate (Betnovate)     |
| Betamipron                             |
| Betapar (Meprednisone)                 |
| Betaxolol (Betoptic)                   |
| Betaxolol hydrochloride (Betoptic)     |
| Bethanechol chloride                   |
| Bexarotene                             |
| Bextra (valdecoxib)                    |
| Bezafibrate                            |
| BIBR-1048 (Dabigatran)                 |
| Bicalutamide (Casodex)                 |
| Bifonazole                             |
| Bimatoprost                            |
| Bindarit                               |
| Biotin (Vitamin B7)                    |
| Biperiden HCl                          |
| Bisacodyl                              |
| Bisoprolol                             |
| Bleomycin sulfate                      |
| Bortezomib (Velcade)                   |
| Bosentan                               |
| Bosutinib (SKI-606)                    |
| Brinzolamide                           |
| Bromhexine HCl                         |
| Brompheniramine                        |
| Broxyquinoline                         |
| Brucine                                |
| Budesonide                             |
| Bufexamac                              |
| Buflomedil HCl                         |

|                                     |
|-------------------------------------|
| Bumetanide                          |
| Bupivacaine hydrochloride (Marcain) |
| Busulfan (Myleran, Busulfex)        |
| Butacaine                           |
| Butenafine HCl                      |
| Butoconazole nitrate                |
| Cabazitaxel (Jevtana)               |
| Calcifediol                         |
| Calcitriol (Rocaltrol)              |
| Calcium Gluceptate                  |
| Camptothecin                        |
| Camylofin Chlorhydrate              |
| Candesartan (Atacand)               |
| Candesartan cilexetil (Atacand)     |
| Capecitabine (Xeloda)               |
| Captopril (Capoten)                 |
| Carbachol                           |
| Carbadox                            |
| Carbamazepine (Carbatrol)           |
| Carbazochrome sodium sulfonate      |
| Carbenicillin disodium              |
| Carbenoxolone Sodium                |
| Carbidopa                           |
| Carbimazole                         |
| Carfilzomib (PR-171)                |
| Carmofur                            |
| Carprofen                           |
| Carvedilol                          |
| Caspofungin acetate                 |
| Catharanthine                       |
| Cefdinir (Omnicef)                  |
| Cefditoren pivoxil                  |
| Cefoperazone (Cefobid)              |
| Ceftazidime Pentahydrate            |
| Ceftiofur hydrochloride             |
| Celecoxib                           |
| Cephalexin (Cefalexin)              |
| Cephalomannine                      |
| Cepharanthine                       |
| Cetirizine Dihydrochloride          |
| Cetrimonium Bromide                 |
| Cetylpyridinium Chloride            |
| Chenodeoxycholic acid               |
| Chloramphenicol (Chloromycetin)     |
| Chlormezanone (Trancopal)           |
| Chlorocresol                        |
| Chlorothiazide                      |
| Chloroxine                          |
| Chlorpheniramine Maleate            |
| Chlorpromazine (Sonazine)           |
| Chlorpropamide                      |
| Chlorprothixene                     |
| Chlorquinaldol                      |
| Chlorzoxazone                       |
| Choline Chloride                    |
| Chromocarb                          |
| Ciclopirox (Penlac)                 |
| Ciclopirox ethanolamine             |
| Cilazapril monohydrate (Inhibace)   |

|                                        |
|----------------------------------------|
| Cilnidipine                            |
| Cilostazol                             |
| Cimetidine (Tagamet)                   |
| Cinchophen                             |
| Cinepazide maleate                     |
| Cinoxacin                              |
| Cisatracurium besylate (Nimbex)        |
| Cisplatin                              |
| Cladribine                             |
| Clarithromycin (Biaxin, Klacid)        |
| Clemastine Fumarate                    |
| Cleviprex (Clevidipine)                |
| Climbazole                             |
| Clinafoxacin HCl                       |
| Clindamycin                            |
| Clindamycin hydrochloride (Dalacin)    |
| Clindamycin palmitate HCl              |
| Clobetasol propionate                  |
| Clofarabine                            |
| Clofazimine                            |
| Clofibric acid                         |
| Clofoctol                              |
| Clomifene citrate (Serophene)          |
| Clomipramine hydrochloride (Anafranil) |
| Clonidine hydrochloride (Catapres)     |
| Clopamide                              |
| Clopidogrel (Plavix)                   |
| Clorgyline HCl                         |
| Clorprenaline HCL                      |
| Clorsulon                              |
| Closantel                              |
| Closantel Sodium                       |
| Clotrimazole (Canesten)                |
| Cloxacillin sodium (Cloxacap)          |
| Clozapine (Clozaril)                   |
| Cobicistat (GS-9350)                   |
| Colistimethate Sodium                  |
| Conivaptan HCl (Vaprisol)              |
| Cortisone acetate (Cortone)            |
| Coumarin                               |
| Crizotinib (PF-02341066)               |
| Crystal violet                         |
| Curcumin                               |
| Cyclamic acid                          |
| Cyclandelate                           |
| Cyclophosphamide monohydrate           |
| Cyclosporine (Neoral)                  |
| Cyproheptadine HCl (Periactin)         |
| Cyromazine                             |
| Cysteamine HCl                         |
| Cytidine                               |
| Dabrafenib (GSK2118436)                |
| Dacarbazine (DTIC-Dome)                |
| Daidzein                               |
| Dapoxetine hydrochloride (Priligy)     |
| DAPT (GSI-IX)                          |
| Darifenacin HBr                        |
| Darunavir Ethanolate (Prezista)        |
| Dasatinib (BMS-354825)                 |



|                                    |
|------------------------------------|
| Daunorubicin HCl (Daunomycin HCl)  |
| Decamethonium bromide              |
| Decitabine                         |
| Deferasirox (Exjade)               |
| Deflazacort (Calcort)              |
| Dehydroepiandrosterone (DHEA)      |
| Deoxyarbutin                       |
| Deoxycorticosterone acetate        |
| Desloratadine                      |
| Desonide                           |
| Detomidine HCl                     |
| Dexamethasone                      |
| Dexamethasone acetate              |
| Dexlansoprazole                    |
| Dexmedetomidine                    |
| Dexmedetomidine HCl (Precedex)     |
| Dexrazoxane Hydrochloride          |
| Dextrose (D-glucose)               |
| Dibenzepine HCl                    |
| Dibenzothiophene                   |
| Dibucaine HCL                      |
| Dichlorisone Acetate               |
| Dichlorphenamide (Diclofenamide)   |
| Diclazuril                         |
| Diclofenac                         |
| Diclofenac Diethylamine            |
| Diclofenac Potassium               |
| Dicloxacillin Sodium               |
| Dicyclomine HCl                    |
| Didanosine (Videx)                 |
| Dienogest                          |
| Diethylstilbestrol (Stilbestrol)   |
| Difloxacin HCl                     |
| Difluprednate                      |
| Digoxigenin                        |
| Diltiazem HCl (Tiazac)             |
| Dimaprit 2HCl                      |
| Dimethyl Fumarate                  |
| Diminazene Aceturate               |
| Diperodon HCl                      |
| Diphemanil methylsulfate           |
| Diphenhydramine HCl (Benadryl)     |
| Diphenylpyraline HCl               |
| Dipyridamole (Persantine)          |
| Dirithromycin                      |
| Disopyramide Phosphate             |
| Disulfiram (Antabuse)              |
| Divalproex sodium                  |
| DL-Carnitine hydrochloride         |
| D-Mannitol (Osmitrol)              |
| Docetaxel (Taxotere)               |
| Dofetilide (Tikosyn)               |
| Domiphen Bromide                   |
| Domperidone (Motilium)             |
| Dopamine hydrochloride (Inotropin) |
| Doripenem Hydrate                  |
| Doxapram HCl                       |
| Doxazosin mesylate                 |
| Doxercalciferol (Hectorol)         |

|                                       |
|---------------------------------------|
| Doxifluridine                         |
| Doxofylline                           |
| Doxorubicin (Adriamycin)              |
| Doxycycline HCl                       |
| Doxylamine Succinate                  |
| Dronedarone HCl (Multaq)              |
| Droperidol                            |
| Dropropizine                          |
| Drospirenone                          |
| Duloxetine HCl (Cymbalta)             |
| Dutasteride                           |
| Dyclonine HCl                         |
| Dydrogesterone                        |
| Dyphylline (Dilor)                    |
| Econazole nitrate (Spectazole)        |
| Edaravone (MCI-186)                   |
| Eltrombopag (SB-497115-GR)            |
| Elvitegravir (GS-9137)                |
| Emetine                               |
| Emtricitabine (Emtriva)               |
| Enalapril maleate (Vasotec)           |
| Enalaprilat dihydrate                 |
| Enoxacin (Penetrex)                   |
| Entacapone                            |
| Entecavir hydrate                     |
| Epalrestat                            |
| Epinephrine bitartrate (Adrenalinium) |
| Epirubicin Hydrochloride              |
| Eprosartan Mesylate                   |
| Erdosteine                            |
| Erlotinib HCl                         |
| Erythromycin (E-Mycin)                |
| Erythromycin Ethylsuccinate           |
| Escitalopram oxalate                  |
| Esmolol HCl                           |
| Esomeprazole magnesium (Nexium)       |
| Esomeprazole sodium (Nexium)          |
| Estradiol                             |
| Estradiol Cypionate                   |
| Estradiol valerate                    |
| Estriol                               |
| Estrone                               |
| Ethacridine lactate monohydrate       |
| Ethambutol HCl                        |
| Ethamsylate                           |
| Ethinyl Estradiol                     |
| Ethionamide                           |
| Ethoxzolamide                         |
| Ethinodiol diacetate                  |
| Etodolac (Lodine)                     |
| Etomidate                             |
| Etoposide (VP-16)☐                    |
| Etravirine (TMC125)                   |
| Everolimus (RAD001)                   |
| Evista (Raloxifene Hydrochloride)     |
| Exemestane                            |
| Ezetimibe (Zetia)                     |
| Famciclovir (Famvir)                  |
| Famotidine (Pepcid)                   |

|                                            |
|--------------------------------------------|
| Famprofazone                               |
| Febuxostat (Uloric)                        |
| Felbamate                                  |
| Felodipine (Plendil)                       |
| Fenbendazole (Panacur)                     |
| Fenofibrate (Tricor, Trilipix)             |
| Fenoprofen calcium                         |
| Fenoprofen calcium hydrate                 |
| Fenspiride HCl                             |
| Fenticonazole nitrate                      |
| Fexofenadine HCl                           |
| Fidaxomicin                                |
| Finasteride                                |
| FK-506 (Tacrolimus)                        |
| Flavoxate HCl                              |
| Florfenicol                                |
| Floxuridine                                |
| Fluconazole                                |
| Flucytosine (Ancobon)                      |
| Fludarabine (Fludara)                      |
| Fludarabine Phosphate (Fludara)            |
| Flumazenil                                 |
| Flumequine                                 |
| Flumethasone                               |
| Flunarizine 2HCl                           |
| Flunixin meglumin                          |
| Fluocinolone acetonide (Flucort-N)         |
| Fluocinonide (Vanos)                       |
| Fluorometholone Acetate                    |
| Fluoxetine HCl                             |
| Flurbiprofen (Ansaid)                      |
| Flutamide (Eulexin)                        |
| Fluticasone propionate (Flonase, Veramyst) |
| Fluvastatin sodium (Lescol)                |
| Fluvoxamine maleate                        |
| Formoterol hemifumarate                    |
| Fosaprepitant dimeglumine                  |
| Fosfomycin Tromethamine                    |
| Ftorafur                                   |
| Fulvestrant (Faslodex)                     |
| Furaltadone HCl                            |
| Furosemide (Lasix)                         |
| Gallamine triethiodide (Flaxedil)          |
| Ganciclovir                                |
| Gefitinib (Iressa)                         |
| Gemcitabine (Gemzar)                       |
| Gemfibrozil (Lopid)                        |
| Genipin                                    |
| Geniposide                                 |
| Geniposidic acid                           |
| Genistein                                  |
| Gestodene                                  |
| Gimeracil                                  |
| Ginkgolide A                               |
| Glafenine HCl                              |
| Gliclazide (Diamicron)                     |
| Glimepiride                                |
| Glipizide (Glucotrol)                      |
| Gliquidone                                 |

|                                    |
|------------------------------------|
| Glyburide (Diabeta)                |
| Guaifenesin (Guaiphenesin)         |
| Guanabenz acetate                  |
| Guanidine HCl                      |
| Halobetasol Propionate             |
| Haloperidol (Haldol)               |
| Homatropine Bromide                |
| Homatropine Methylbromide          |
| Hydrastinine HCl                   |
| Hydrochlorothiazide                |
| Hydrocortisone (Cortisol)          |
| Hydroxyurea (Cytodrox)             |
| Hydroxyzine 2HCl                   |
| Hyoscyamine (Daturine)             |
| Ibuprofen (Advil)                  |
| Ibutilide fumarate                 |
| Idarubicin HCl                     |
| Idebenone                          |
| Idoxuridine                        |
| Ifosfamide                         |
| Iloperidone (Fanapt)               |
| Imatinib (Gleevec)                 |
| Imatinib Mesylate                  |
| Imidapril (Tanatril) HCl           |
| Imipramine HCl                     |
| Incivek (VX950)                    |
| Indacaterol Maleate                |
| Indapamide (Lozol)                 |
| Indomethacin (Indocid, Indocin)    |
| Ipratropium bromide                |
| Irinotecan                         |
| Irinotecan HCl Trihydrate (Campto) |
| Irsogladine                        |
| Isoconazole nitrate (Travogen)     |
| Isoetharine Mesylate               |
| Isoniazid (Tubizid)                |
| Isoprenaline hydrochloride         |
| Isosorbide                         |
| Isotretinoin                       |
| Isovaleramide                      |
| Isoxicam                           |
| Isradipine (Dynacirc)              |
| Itraconazole (Sporanox)            |
| Ivabradine HCl (Procoralan)        |
| Ivacaftor (VX-770)                 |
| Ivermectin                         |
| Ketoconazole                       |
| Ketoprofen (Actron)                |
| Ketorolac (Toradol)                |
| Ketotifen fumarate (Zaditor)       |
| Lacidipine (Lacipil, Motens)       |
| L-Adrenaline (Epinephrine)         |
| Lafutidine                         |
| Lamivudine (Epivir)                |
| Lamotrigine                        |
| Lansoprazole                       |
| Lapatinib                          |
| Lapatinib Ditosylate (Tykerb)      |
| Leflunomide                        |

|                                     |
|-------------------------------------|
| Lenalidomide                        |
| Letrozole                           |
| Levetiracetam                       |
| Levobetaxolol HCl                   |
| Levofloxacin (Levaquin)             |
| Levonorgestrel (Levonelle)          |
| Levosimendan                        |
| Levosulpiride (Levogastrol)         |
| Licofelone                          |
| Lidocaine (Alphacaine)              |
| Linagliptin (BI-1356)               |
| Lincomycin hydrochloride (Lincocin) |
| Linezolid (Zyvox)                   |
| Liothyronine Sodium                 |
| Lithocholic acid                    |
| Lofexidine HCl                      |
| Lomerizine HCl                      |
| Lomustine (CeeNU)                   |
| Lonidamine                          |
| Loperamide hydrochloride            |
| Lopinavir (ABT-378)                 |
| Loratadine                          |
| Lornoxicam (Xefo)                   |
| Losartan potassium                  |
| Loteprednol etabonate               |
| Lovastatin (Mevacor)                |
| Loxapine Succinate                  |
| L-Thyroxine                         |
| Malotilate                          |
| Manidipine (Manyper)                |
| Maprotiline hydrochloride           |
| Maraviroc                           |
| Masitinib (AB1010)                  |
| MDV3100 (Enzalutamide)              |
| Mecarbinat                          |
| Meclocycline Sulfosalicylate        |
| Meclofenamate Sodium                |
| Medetomidine HCl                    |
| Medroxyprogesterone acetate         |
| Medrysone                           |
| Mefenamic acid                      |
| Megestrol Acetate                   |
| Meglumine                           |
| Melatonin                           |
| Meloxicam (Mobic)                   |
| Memantine HCl (Namenda)             |
| Menadione                           |
| Mepenzolate Bromide                 |
| Mepiroxol                           |
| Mepivacaine HCl                     |
| Meptazinol HCl                      |
| Mequinol                            |
| Mercaptopurine                      |
| Meropenem                           |
| Mesalamine (Lialda)                 |
| Mesna (Uromitexan, Mesnex)          |
| Mesoridazine Besylate               |
| Mestranol                           |
| Metaproterenol Sulfate              |

|                                           |
|-------------------------------------------|
| Metaraminol Bitartrate                    |
| Methacycline hydrochloride (Physiomycine) |
| Methapyrilene HCl                         |
| Methazolamide                             |
| Methazolastone                            |
| Methenamine (Mandelamine)                 |
| Methimazole (Tapazole, Northyx)           |
| Methocarbamol (Robaxin)                   |
| Methoxamine HCl                           |
| Methoxsalen (Oxsoralen)                   |
| Methscopolamine (Pamine)                  |
| Methyclothiazide                          |
| Methylhydantoin-5-(D)                     |
| Methylprednisolone                        |
| Methylthiouracil                          |
| Metricrane                                |
| Metolazone (Zaroxolyn)                    |
| Metoprolol tartrate                       |
| Metronidazole (Flagyl)                    |
| Mevastatin                                |
| Mexiletine HCl                            |
| Mezlocillin Sodium                        |
| Mianserin hydrochloride                   |
| Miconazole (Monistat)                     |
| Miconazole nitrate                        |
| Mifepristone (Mifeprex)                   |
| Miglitol (Glyset)                         |
| Milnacipran HCl                           |
| Milrinone (Primacor)                      |
| Mirabegron (YM178)                        |
| Mirtazapine (Remeron, Avanza)             |
| Mitotane (Lysodren)                       |
| Mitoxantrone Hydrochloride                |
| Moclobemide                               |
| Moexipril HCl                             |
| Moguisteine                               |
| Mometasone furoate                        |
| Monobenzene (Benzoquin)                   |
| Montelukast Sodium                        |
| Moroxydine                                |
| Mosapride citrate                         |
| Moxalactam Disodium                       |
| Moxifloxacin hydrochloride                |
| Moxonidine                                |
| Mupirocin                                 |
| Mycophenolate mofetil (CellCept)          |
| Mycophenolic (Mycophenolate)              |
| Nabumetone                                |
| Nadifloxacin                              |
| Nafamostat mesylate                       |
| nafticillin sodium monohydrate            |
| Naftopidil (Flivas)                       |
| Nalidixic acid (NegGram)                  |
| Nalmefene HCl                             |
| Naloxone HCl                              |
| Naltrexone HCl                            |
| Naphazoline hydrochloride (Naphcon)       |
| Naproxen (Aleve)                          |
| Naratriptan HCl                           |

|                                                 |
|-------------------------------------------------|
| Natamycin (Pimaricin)                           |
| Nateglinide (Starlix)                           |
| Nebivolol (Bystolic)                            |
| Nefiracetam (Translon)                          |
| Nelarabine (Arranon)                            |
| Nelfinavir Mesylate                             |
| Nepafenac                                       |
| Nevirapine (Viramune)                           |
| Niacin (Nicotinic acid)                         |
| Nialamide                                       |
| Nicardipine HCl                                 |
| Nicorandil (Ikorel)                             |
| Nicotinamide (Niacinamide)                      |
| Nicotine Ditartrate                             |
| Nifedipine (Adalat)                             |
| Nifenazone                                      |
| Niflumic acid                                   |
| Nifuroxazide                                    |
| Nilotinib (AMN-107)                             |
| Nilvadipine (ARC029)                            |
| Nimesulide                                      |
| Nimodipine (Nimotop)                            |
| Nisoldipine (Sular)                             |
| Nitarsons                                       |
| Nitazoxanide (Alinia, Annita)                   |
| Nithiamide                                      |
| Nitrendipine                                    |
| Nitrofurazone (Nitrofurazone)                   |
| Nizatidine                                      |
| Nomifensine Maleate                             |
| Noradrenaline bitartrate monohydrate (Levophed) |
| norethindrone                                   |
| Noscapine HCl                                   |
| Novobiocin sodium (Albamycin)                   |
| Nystatin (Mycostatin)                           |
| Olanzapine (Zyprexa)                            |
| Olmesartan medoxomil (Benicar)                  |
| Olopatadine hydrochloride (Opatanol)            |
| olsalazine sodium                               |
| Omeprazole (Prilosec)                           |
| Ondansetron hydrochloride (Zofran)              |
| Orlistat (Alli, Xenical)                        |
| Ornidazole                                      |
| Orphenadrine citrate (Norflex)                  |
| OSI-420 (Desmethyl Erlotinib)                   |
| Ospemifene                                      |
| Otilonium Bromide                               |
| Ouabain                                         |
| Oxaliplatin (Eloxatin)                          |
| Oxaprozin                                       |
| Oxcarbazepine                                   |
| Oxeladin Citrate                                |
| Oxethazaine                                     |
| Oxfendazole                                     |
| Oxprenolol HCl                                  |
| Oxybuprocaine HCl                               |
| Oxybutynin (Ditropan)                           |
| Oxybutynin chloride                             |
| Oxymetazoline hydrochloride                     |

|                                         |
|-----------------------------------------|
| Oxytetracycline (Terramycin)            |
| Oxytetracycline dihydrate               |
| Ozagrel                                 |
| Ozagrel HCl                             |
| Paclitaxel (Taxol)                      |
| Paeoniflorin                            |
| Pancuronium (Pavulon)                   |
| Pantothenic acid (pantothenate)         |
| Paroxetine HCl                          |
| Pasinazid                               |
| Pazopanib                               |
| Pazopanib HCl                           |
| PCI-32765 (Ibrutinib)                   |
| Pefloxacin mesylate                     |
| Penciclovir                             |
| Penfluridol                             |
| Pentamidine                             |
| Pentoxifylline                          |
| Pergolide mesylate                      |
| Phenacetin                              |
| Phenazopyridine HCl                     |
| Phenformin hydrochloride                |
| Phenindione (Rectadione)                |
| Pheniramine Maleate                     |
| Phenothrin                              |
| Phenoxybenzamine HCl                    |
| Pentolamine mesilate                    |
| Phenylbutazone (Butazolidin, Butatron)  |
| Phenylephrine HCl                       |
| Phenytoin (Lepitoin)                    |
| Phenytoin sodium (Dilantin)             |
| Phosphatidylcholine                     |
| Phthalylsulfacetamide                   |
| Physostigmine Salicylate                |
| Picrotoxinin                            |
| Pidotimod                               |
| Pilocarpine HCl                         |
| Pimecrolimus                            |
| Pimobendan (Vetmedin)                   |
| Pimozide                                |
| Pinacidil                               |
| Pindolol                                |
| Pioglitazone (Actos)                    |
| Pioglitazone hydrochloride (Actos)      |
| Pipenzolate Bromide                     |
| Piperacillin Sodium                     |
| Piromidic Acid                          |
| Piroxicam (Feldene)                     |
| Pitavastatin calcium (Livalo)           |
| Pizotifen malate                        |
| PMSF (Phenylmethylsulfonyl Fluoride)    |
| Pomalidomide                            |
| Ponatinib (AP24534)                     |
| Posaconazole                            |
| Potassium iodide                        |
| Pralatrexate (Folotylin)                |
| Pramipexole (Mirapex)                   |
| Pramipexole dihydrochloride monohydrate |
| Pramiracetam                            |



|                                      |
|--------------------------------------|
| Pramoxine HCl                        |
| Pranlukast                           |
| Pranoprofen                          |
| Prasugrel (Effient)                  |
| Pravastatin sodium                   |
| Praziquantel (Biltricide)            |
| Prednisolone (Hydroretrocortine)     |
| Prednisolone acetate (Omnipred)      |
| Prednisone (Adasone)                 |
| Pregnenolone                         |
| Pridinol Methanesulfonate            |
| Prilocaine                           |
| Primaquine Diphosphate               |
| Primidone (Mysoline)                 |
| Proadifen HCl                        |
| Probenecid (Benemid)                 |
| Probucol                             |
| Procaine (Novocaine) HCl             |
| Prochlorperazine Dimaleate           |
| Procodazole                          |
| Procyclidine HCl                     |
| Progesterone (Prometrium)            |
| Propafenone (Rytmonorm)              |
| Proparacaine HCl                     |
| Propranolol HCl                      |
| Propylthiouracil                     |
| Prothionamide (Prothionamide)        |
| Pyrazinamide (Pyrazinoic acid amide) |
| Pyridostigmine Bromide (Mestinon)    |
| Pyridoxine hydrochloride             |
| Pyrilamine Maleate                   |
| Pyrimethamine                        |
| Pyrithione zinc                      |
| Quetiapine fumarate (Seroquel)       |
| Quinapril HCl (Accupril)             |
| Quinine hydrochloride dihydrate      |
| Quipazine Maleate                    |
| R(-)-Apomorphine HCl Hemihydrate     |
| Racecadotril (Acetorphan)            |
| Ractopamine HCl                      |
| Raltegravir (MK-0518)                |
| Ramelteon (TAK-375)                  |
| Ramipril (Altace)                    |
| Ranitidine (Zantac)                  |
| Ranolazine (Ranexa)                  |
| Ranolazine dihydrochloride           |
| Rapamycin (Sirolimus)                |
| Rasagiline mesylate                  |
| Rebamipide                           |
| Reboxetine mesylate                  |
| Regorafenib (BAY 73-4506)            |
| Repaglinide                          |
| Reserpine                            |
| Resveratrol                          |
| Retapamulin                          |
| Ribavirin (Copegus)                  |
| Rifabutin (Mycobutin)                |
| Rifampin (Rifadin, Rimactane)        |
| Rifapentine (Priftin)                |

|                                   |
|-----------------------------------|
| Rifaximin (Xifaxan)               |
| Riluzole (Rilutek)                |
| Rimantadine (Flumadine)           |
| Rimonabant (SR141716)             |
| Risperidone (Risperdal)           |
| Ritodrine hydrochloride (Yutopar) |
| Ritonavir                         |
| Rivastigmine tartrate (Exelon)    |
| Rizatriptan Benzoate (Maxalt)     |
| Rocuronium bromide                |
| Rofecoxib (Vioxx)                 |
| Roflumilast (Daxas)               |
| Rolipram                          |
| Rolitetracycline                  |
| Ronidazole                        |
| Ropinirole HCl                    |
| Ropivacaine HCl                   |
| Rosiglitazone (Avandia)           |
| Rosiglitazone HCl                 |
| Rosiglitazone maleate             |
| Rosuvastatin calcium (Crestor)    |
| Rotigotine                        |
| Roxatidine acetate HCl            |
| Roxithromycin (Roxl-150)          |
| Rufinamide (Banzel)               |
| Ruxolitinib (INCB018424)          |
| S-(+)-Rolipram                    |
| Salicylanilide                    |
| Sasapyrine                        |
| Saxagliptin (BMS-477118, Onglyza) |
| Scopine                           |
| Scopolamine hydrobromide          |
| Secnidazole (Flagentyl)           |
| Serotonin HCl                     |
| Sertaconazole nitrate             |
| Sertraline HCl                    |
| Sildenafil citrate                |
| Silodosin (Rapaflo)               |
| Simvastatin (Zocor)               |
| Sodium 4-aminohippurate Hydrate   |
| Sodium ascorbate                  |
| Sodium nitrite                    |
| Sodium Nitroprusside              |
| Sodium Picosulfate                |
| Sodium salicylate                 |
| Solifenacin succinate             |
| Sorafenib (Nexavar)               |
| Sorbitol (Glucitol)               |
| Sotalol (Betapace)                |
| Sparfloxacin                      |
| Spectinomycin hydrochloride       |
| Spiramycin                        |
| Spironolactone                    |
| Stavudine                         |
| Streptozotocin (Zanosar)          |
| Sucralose                         |
| Sulbactam                         |
| Sulbactam sodium (Unasyn)         |
| Sulconazole Nitrate               |

|                                         |
|-----------------------------------------|
| sulfacetamide sodium                    |
| Sulfadiazine                            |
| Sulfaguanidine                          |
| Sulfamerazine                           |
| Sulfameter (Bayrena)                    |
| Sulfamethazine                          |
| Sulfamethizole (Proklar)                |
| Sulfamethoxazole                        |
| Sulfanilamide                           |
| Sulfasalazine (Azulfidine)              |
| Sulfathiazole                           |
| Sulfisoxazole                           |
| Sulindac (Clinoril)                     |
| Sulphadimethoxine                       |
| Sumatriptan succinate                   |
| Sunitinib Malate (Sutent)               |
| Suplatast tosylate                      |
| Suprofen (Profenal)                     |
| Tacrine HCl                             |
| Tadalafil (Cialis)                      |
| TAME                                    |
| Tamoxifen Citrate (Nolvadex)            |
| Tazarotene (Avage)                      |
| Tebipenem pivoxil (L-084)               |
| Telbivudine (Sebivo, Tyzeka)            |
| Telmisartan (Micardis)                  |
| Temocapril HCl                          |
| Temsirolimus (Torisel)                  |
| Teniposide (Vumon)                      |
| Tenofovir Disoproxil Fumarate           |
| Tenoxicam (Mobiflex)                    |
| Terazosin HCl (Hytrin)                  |
| Terbinafine (Lamisil, Terbinex)         |
| Terbinafine hydrochloride (Lamisil)     |
| Terfenadine                             |
| Terflunomide                            |
| Tetracaine hydrochloride (Pontocaine)   |
| Tetracycline HCl                        |
| tetrahydrozoline hydrochloride          |
| Thalidomide                             |
| Thiabendazole                           |
| Thiamphenicol (Thiophenicol)            |
| Thioridazine HCl                        |
| Thiostrepton                            |
| Thonzonium Bromide                      |
| Tianeptine sodium                       |
| Ticagrelor                              |
| Tigecycline                             |
| Tilmicosin                              |
| tinidazole                              |
| Tioconazole                             |
| Tiopronin (Thiola)                      |
| Tiotropium Bromide hydrate              |
| Tioxolone                               |
| Tiratricol                              |
| Tizanidine HCl                          |
| Tofacitinib citrate (CP-690550 citrate) |
| Tolazamide                              |
| Tolbutamide                             |

|                                              |
|----------------------------------------------|
| Tolcapone                                    |
| Tolfenamic acid                              |
| Tolmetin Sodium                              |
| Tolnaftate                                   |
| Tolperisone HCl                              |
| Tolterodine tartrate (Detrol LA)             |
| toltrazuril                                  |
| Tolvaptan (OPC-41061)                        |
| Topiramate                                   |
| Topotecan HCl                                |
| Toremifene Citrate (Fareston, Acapodene)     |
| Tranilast (SB 252218)                        |
| Tretinoin (Aberela)                          |
| Triamcinolone (Aristocort)                   |
| Triamcinolone Acetonide                      |
| triamterene                                  |
| Trichlormethiazide (Achletin)                |
| Triclabendazole                              |
| Trifluoperazine 2HCl                         |
| Triflupromazine HCl                          |
| Trifluridine (Viroptic)                      |
| Triflusal                                    |
| Trilostane                                   |
| Trimebutine                                  |
| Trimethoprim                                 |
| Trimipramine Maleate                         |
| Tripelennamine HCl                           |
| Trometamol                                   |
| Tropicamide                                  |
| Tropisetron                                  |
| Trospium chloride (Sanctura)                 |
| Troxipide                                    |
| Tylosin tartrate                             |
| Ulipristal                                   |
| Uracil                                       |
| Urapidil HCl                                 |
| Uridine                                      |
| Ursodiol (Actigal Urso)                      |
| Valaciclovir HCl                             |
| valganciclovir hydrochloride                 |
| Valnemulin HCl                               |
| Valproic acid sodium salt (Sodium valproate) |
| Valsartan (Diovan)                           |
| Vandetanib (Zactima)                         |
| Vardenafil (Vivanza)                         |
| Vecuronium Bromide                           |
| Vemurafenib (PLX4032)                        |
| Venlafaxine                                  |
| Verteporfin (Visudyne)                       |
| Vidarabine (Vira-A)                          |
| Vildagliptin (LAF-237)                       |
| Vinblastine                                  |
| Vincristine                                  |
| Vinorelbine Tartrate                         |
| Vismodegib (GDC-0449)                        |
| Vitamin B12                                  |
| Vitamin C (Ascorbic acid)                    |
| Vitamin D2                                   |
| Vitamin D3 (Cholecalciferol)                 |

|                           |
|---------------------------|
| Voglibose                 |
| Voriconazole              |
| Vorinostat (SAHA)         |
| Xarelto                   |
| XL-184 (Cabozantinib)     |
| Xylazine HCl              |
| Xylometazoline HCl        |
| Xylose                    |
| Zafirlukast (Accolate)    |
| Zalcitabine               |
| Zaltoprofen               |
| Zanamivir (Relenza)       |
| Zidovudine (Retrovir)     |
| Zileuton                  |
| Ziprasidone hydrochloride |
| Zolmitriptan (Zomig)      |
| Zonisamide                |
| Zoxazolamine              |
